# Supplementary material for: Cinnamic Acid Analogs as Intervention Catalysts for Overcoming Antifungal Tolerance
Source: MDPI journal article supplement (doi:10.3390/molecules22101783), 2017-10-21
Supplement: s1 [file s1]

## Supplementary Figures

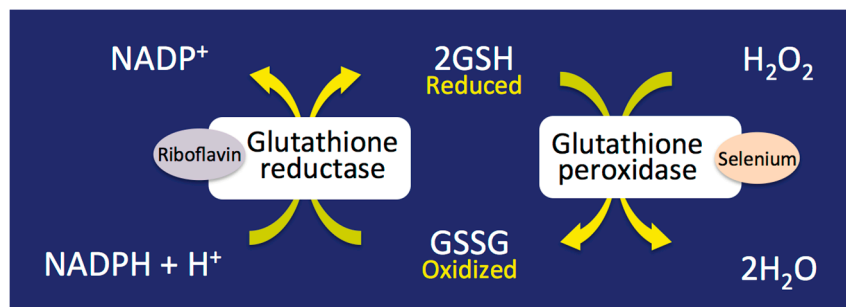

**Figure S1.** Diagram showing the role of glutathione reductase to reduce GSSG (Oxidized glutathione) to GSH (Reduced glutathione) (Adapted from [21]).

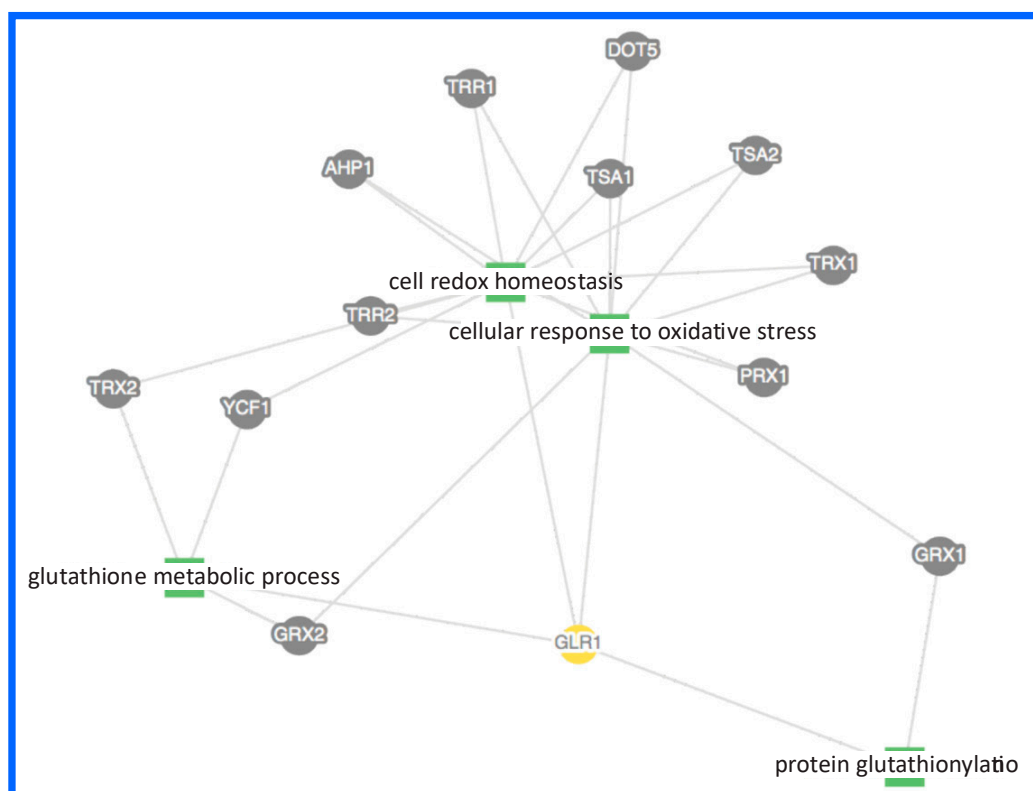

**Figure S2.** Diagram showing *GLR1* interacting genes. Functions of *GLR1* interacting genes include: (1) Cell redox homeostasis, (2) Cellular response to oxidative stress, (3) Protein glutathionylation, and (4) Glutathione metabolic process (Downloaded from *Saccharomyces cerevisiae* Genome Database; [22]).
